# Supplementary material
Source: bioRxiv or medRxiv preprint supplement (https://www.biorxiv.org/highwire/filestream/73525/field_highwire_adjunct_files/0/240440-1.pdf)
Supplement: Supplementary file [file 240440-1.pdf]

1 Supplementary Material

2

3 One problem, too many solutions: How costly is honest signalling  
4 of need?

5 Szabolcs Számadó<sup>1,2</sup>, Dániel Czégel<sup>2,3</sup> and István Zachar<sup>2,4,5</sup>

6

7 <sup>1</sup> RECENS „Lendület” Research Group, MTA Centre for Social Science, Tóth Kálmán u. 4., 1097  
8 Budapest, Hungary

9 <sup>2</sup> Evolutionary Systems Research Group, MTA, Centre for Ecological Research, Hungarian  
10 Academy of Sciences, Klebelsberg Kunó str. 3., 8237 Tihany, Hungary

11 <sup>3</sup> Department of Plant Systematics, Ecology and Theoretical Biology, Eötvös Loránd University,  
12 Pázmány Péter sétány 1/c, 1117 Budapest, Hungary

13 <sup>4</sup> MTA-ELTE Theoretical Biology and Evolutionary Ecology Research Group, Eötvös Loránd  
14 University, Department of Plant Taxonomy and Ecology, Pázmány Péter sétány 1/c, 1117  
15 Budapest, Hungary

16 <sup>5</sup> Center for the Conceptual Foundations of Science, Parmenides Foundation, Kirchplatz 1, 82049  
17 Pullach/Munich, Germany

18

19 21 December 2017

20

21 e-mail: [szamszab@ludens.elte.hu](mailto:szamszab@ludens.elte.hu)

22

## 23 Appendix 1. Different cost functions

24 There are two kinds of cost functions: (i)  $f(x)$  specifies signal cost as the function of signal intensity  
25 (i.e. as a function of the offspring strategy); (ii)  $L(c,z)$  specifies the cost as function of the quality  
26 of the offspring ( $c$ ) and the parental investment ( $z$ ). Note that  $x(c)$  and  $z(x)$  are the offspring and  
27 parental strategies respectively. At the honest signalling equilibrium there is a pair of optimal  
28 parent and offspring strategies  $(z^*(x), x^*(c))$  from which it does not worth departing unilaterally  
29 for any of the participants. Let's denote  $f(x^*(c)) = \tilde{f}(c)$  and  $L(c, z^*(x^*(c))) = L(c, \tilde{z}(c)) =$   
30  $\tilde{L}(c)$ . While  $f(x)$  is not known beforehand, one can calculate  $L(c,z)$  at the equilibrium (see  
31 Appendix 2.), which also yields the value of  $f(x)$  at the equilibrium, thus at equilibrium (where  
32 parties play their optimal strategies):  $\tilde{L}(c) = \tilde{f}(c)$ .

33

## 34 Appendix 2. Existence and stability of the signalling equilibria

35 The very same argument that was used by Nöldeke and Samuelson [1] can be used here to arrive  
36 at the second equilibrium signal cost. Only those parts should be checked where the explicit form  
37 of the cost function were used. Thus, concerning the existence of the proposition it remains to  
38 see whether the optimality condition can be derived with the new cost function (Eq. 14).

$$39 \quad h(c, z^*(x^*(c))) + \psi g(Z - z^*(x^*(c))) - f(x^*(c)) = \quad (A.1)$$

$$40 \quad h(c, \tilde{z}(c)) + \psi g(Z - \tilde{z}(c)) - mL(\tilde{z}(c)) =$$

$$41 \quad \psi (g(Z - \tilde{z}(c)) + \gamma h(c, \tilde{z}(c))) - mh(c^0, z^0) \geq$$

$$42 \quad \psi (g(Z - z^*(c)) + \gamma h(c, z^*(c))) - mh(c^0, z^0) =$$

$$43 \quad h(c, z^*(c)) + \psi g(Z - z^*(c)) - mL(z^*(c)) \geq$$

$$44 \quad h(c, z^*(x)) + \psi g(Z - z^*(x)) - f(x).$$

45 The only change in this sequence is that Eq. 14 was used instead of Eq. 10. One can see that at  
46 the second step after the rearrangement we obtain the parent's maximisation problem as it was  
47 obtained by Nöldeke and Samuelson [1], using Eq. 10. Thus, Eq. 14 works, and the same  
48 argument can be applied.

49 The equilibrium condition for the offspring's inclusive fitness is:

$$50 \quad h(c, \bar{z}(c)) + \psi g(Z - \bar{z}(c)) - f(x^*(c)) \geq h(c, z^*(x(c))) + \psi g(Z - z^*(x(c))) - f(x(c)). \quad (\text{A.2})$$

51 Thus, we are looking for the signalling strategy  $x^*(c)$  that optimizes the offspring's inclusive  
52 fitness  $v$ , as a function of signal intensity  $x$ :

$$53 \quad v(x(c)) = h(c, z^*(x(c))) + \psi g(Z - z^*(x(c))) - f(x(c))$$

54 Since  $v$  is a functional of the function  $x(c)$ , the optimal  $x$  can be found by using calculus of  
55 variations [2]: at the optimal  $x(c)$ , the variation of  $v$  with respect to  $x$  has to vanish, yielding the  
56 corresponding Euler-Lagrange equation:

$$57 \quad v_x = \left( h_z(c, \bar{z}(c)) - \psi g_y(Z - \bar{z}(c)) \right) \bar{z}_x(c) - f_x(x^*(c)) = 0$$

58 After rearranging the solution function is:

$$59 \quad \left( h_z(c, \bar{z}(c)) - \psi g_y(Z - \bar{z}(c)) \right) \bar{z}_x(c) = f_x(x^*(c)) \quad (\text{A.3})$$

60 We note, that in the paper of Nöldeke and Samuelson [1], there are consistent typesetting errors  
61 in A.2 and A.3 (and in between), where, presumably, some occurrences of  $x(c)$  were replaced  
62 with  $c$ . We have remedied these errors in our A.2 and A.3 equations.

63 The optimality condition for the parent as a function of resource allocation:

$$64 \quad \gamma h_z(c, \bar{z}(c)) - g_y(Z - \bar{z}(c)) = 0. \quad (\text{A.4})$$

65 This can be rearranged in two different ways:

$$66 \quad h_z(c, \bar{z}(c)) = \frac{1}{\gamma} g_y(Z - \bar{z}(c)), \quad (\text{A.4a})$$

$$67 \quad \gamma h_z(c, \bar{z}(c)) = g_y(Z - \bar{z}(c)). \quad (\text{A.4b})$$

68 As a result, equations A.3 and A.4 can be combined in two different ways. One can either  
69 substitute the right-hand side of A.4a or the left-hand side of A.4b into A.3. The first substitution  
70 gives the following equation:

$$71 \quad f_x(x^*(c)) = m g_y(Z - \bar{z}(c)) \bar{z}_x(c), \quad (\text{A.5})$$

72 where:

$$73 \quad f_x(x^*(c)) = m g_y \left( Z - z^*(x^*(c)) \right) \bar{z}_x(c),$$

74 where  $m = (1/\gamma) - \psi$ . Integrating A.5 gives the cost function:

75 
$$f(x^*(c)) = k - mg(Z - \tilde{z}(c)) \quad (\text{A.6})$$

76 Since the least needy offspring should elicit the smallest resource transfer, that is, it should  
 77 not engage in costly signalling, thus  $k = mg(Z - z^0)$ :

78 
$$f(x^*(c)) = mg(Z - z^0) - mg(Z - \tilde{z}(c)),$$

79 which is identical to Eq.11.

80 The second substitution (i.e. substituting the left-hand side of A.4b into A.3) gives:

81 
$$f_x(x^*(c)) = mh_z(c, \tilde{z}(c))\tilde{z}_x(c), \quad (\text{A.7})$$

82 where:

83 
$$f_x(x^*(c)) = mh_z(c, z^*(x^*(c)))\tilde{z}_x(c),$$

84 where  $m = 1 - \gamma\psi$ . Integrating gives:

85 
$$f(x^*(c)) = mh(c, \tilde{z}(c)) + k. \quad (\text{A.8})$$

86 Again, we should scale this cost function in a way that the least needy young should have zero  
 87 cost, thus  $k = -m h(c, z^0)$ . Substituting  $k$  into A.6 gives:

88 
$$f(x^*(c)) = mh(c, \tilde{z}(c)) - mh(c, z^0),$$

89 which is identical to Eq.15. QED

90

91 [References](#)

92 [1] Nöldeke, G. & Samuelson, L. 1999 How costly is the honest signaling of need? *Journal of*  
 93 *Theoretical Biology* **197**, 527-539.

94 [2] Fox, C. 1950 *An introduction to the calculus of variations*, Courier Corporation.

95
